# Supplementary material for: Fabrication and characterization of ceramic-polymer composite 3D scaffolds and demonstration of osteoinductive propensity with gingival mesenchymal stem cells
Source: Royal Society of Chemistry journal article supplement (doi:10.1039/d3ra04360f), 2023-01-01
Supplement: d3ra04360f1.pdf [file d3ra04360f1.pdf]

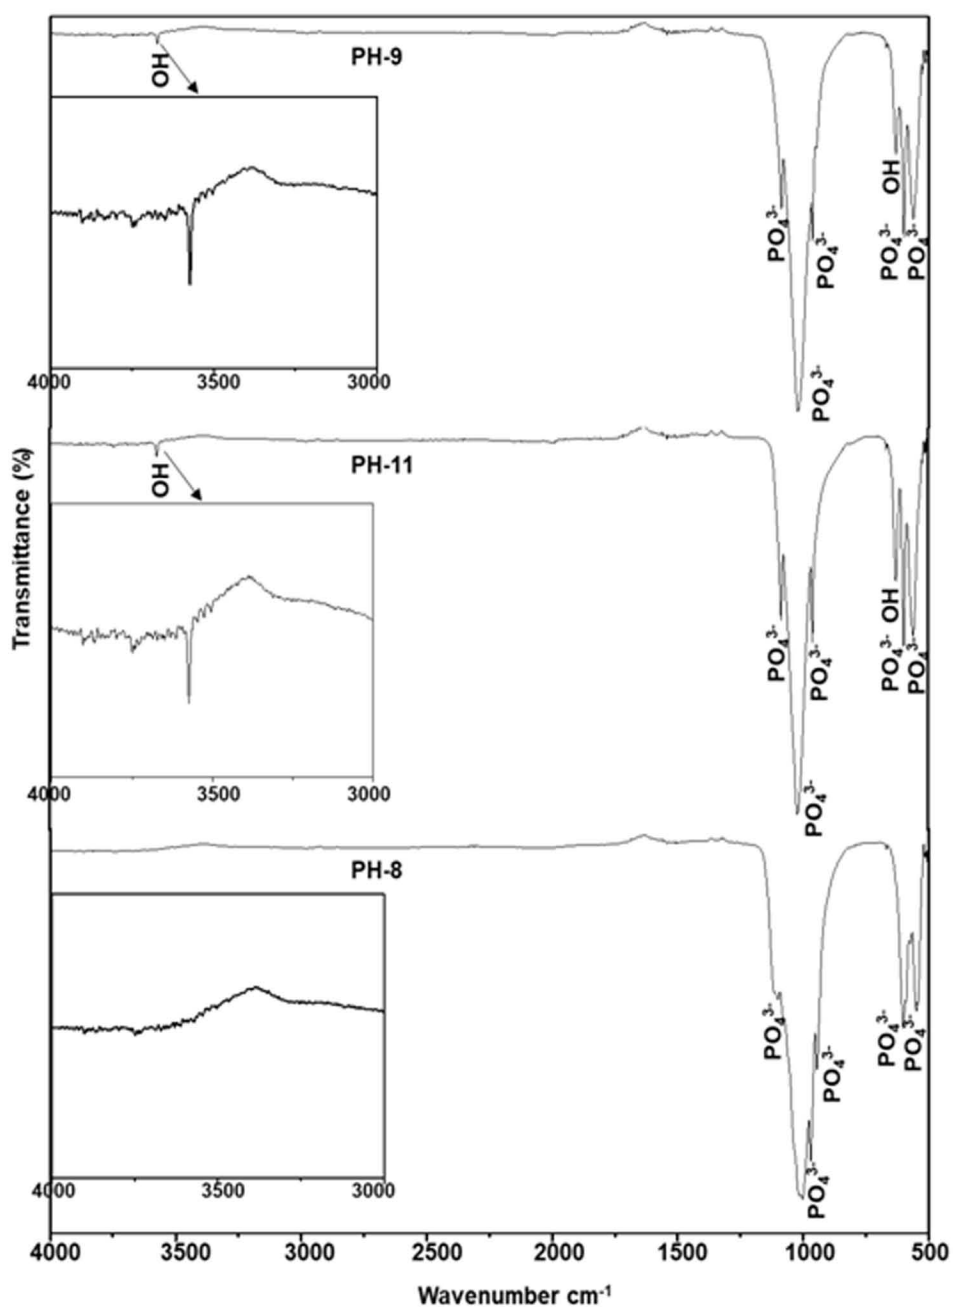

**Fig. S1.** Original FTIR spectra of CP nanomaterials synthesized at pH 8, 9 and 11 respectively.

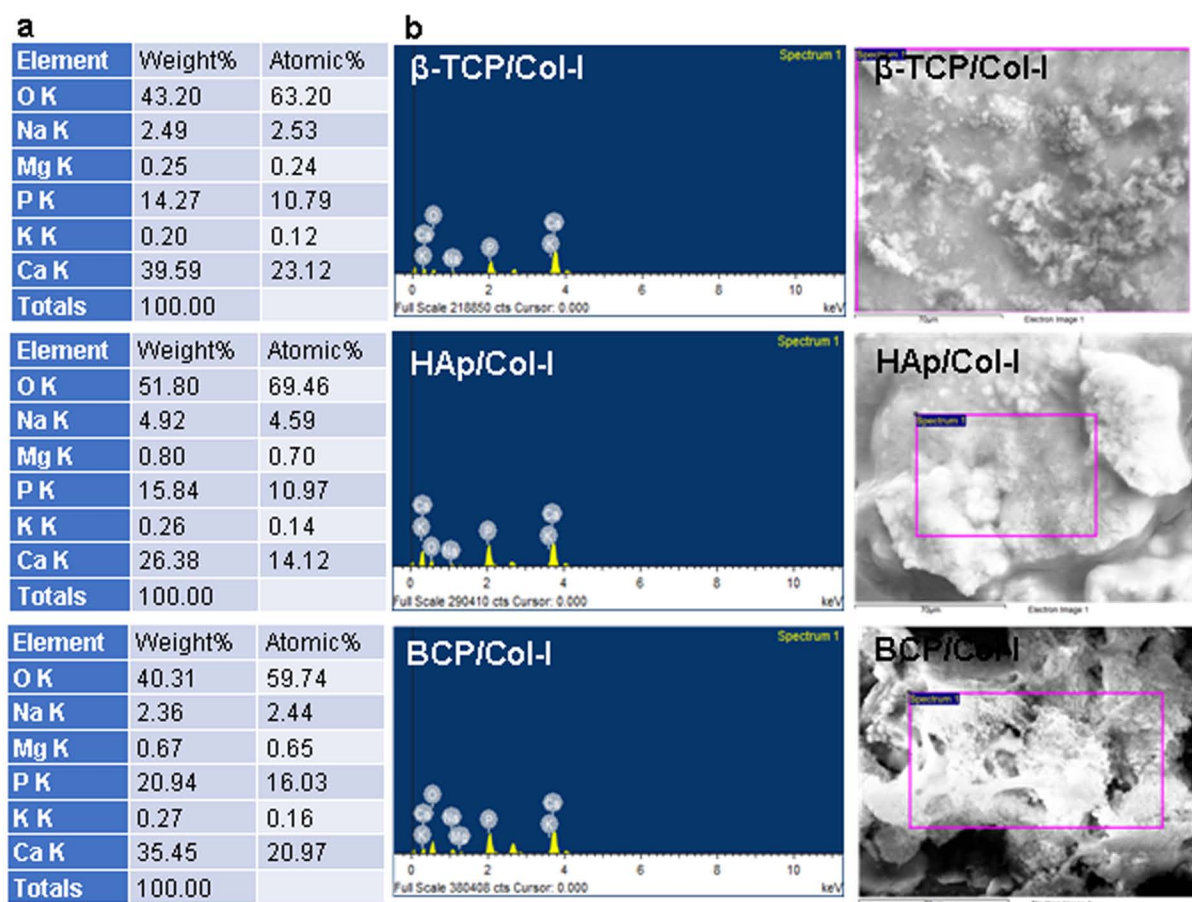

**Fig. S2** (a,b). EDAX and FE-SEM of CP/Col-I scaffolds after 32 days of incubation; a) atomic % and weight % elemental present in the newly formed apatite, b) EDAX spectra and FE-SEM micrographs.
